1 Predicting causal variants affecting expression using whole  
2 genome sequence and RNA-seq from multiple human  
3 tissues

4 Andrew Anand Brown<sup>\*,†,§,\*\*,1</sup> Ana Viñuela<sup>\*,†,§</sup> Olivier Delaneau<sup>\*,†,§</sup>  
5 Tim Spector<sup>††</sup> Kerrin Small<sup>††</sup> Emmanouil T Dermitzakis<sup>\*,†,§,1</sup>

6 November 21, 2016

7 <sup>\*</sup>Department of Genetic Medicine and Development, University of Geneva Medical School,  
8 Geneva, Switzerland.

9 <sup>†</sup> Institute for Genetics and Genomics in Geneva (iGE3), University of Geneva, Geneva, 1211,  
10 Switzerland.

11 <sup>§</sup> Swiss Institute of Bioinformatics, Geneva, 1211, Switzerland.

12 <sup>\*\*</sup>NORMENT, KG Jebsen Centre for Psychosis Research, Division of Mental Health and Addic-  
13 tion, Oslo University Hospital, Oslo, Norway

14 <sup>††</sup>Department of Twin Research and Genetic Epidemiology, King's College London, St Thomas'  
15 Campus, Westminster Bridge Road, London SE1 7EH, UK

16 <sup>1</sup>Corresponding authors. Email: [andrew.brown@unige.ch](mailto:andrew.brown@unige.ch) and [emmanouil.dermitzakis@unige.ch](mailto:emmanouil.dermitzakis@unige.ch)

17

18 Genetic association mapping produces statistical links between phenotypes and genomic  
19 regions, but identifying the causal variants themselves remains difficult. Complete knowledge of

20 all genetic variants, as provided by whole genome sequence (WGS), will help, but is currently  
21 financially prohibitive for well powered GWAS studies. To explore the advantages of WGS in a  
22 well powered setting, we performed eQTL mapping using WGS and RNA-seq, and showed that  
23 the lead eQTL variants called using WGS are more likely to be causal. We derived properties of  
24 the causal variant from simulation studies, and used these to propose a method for implicating  
25 likely causal SNPs. This method predicts that 25% - 70% of the causal variants lie in open  
26 chromatin regions, depending on tissue and experiment. Finally, we identify a set of high  
27 confidence causal variants and show that they are more enriched in GWAS associations than  
28 other eQTL. Of these, we find 65 associations with GWAS traits and show examples where the  
29 gene implicated by expression has been functionally validated as relevant for complex traits.

30 Genome-wide associations studies (GWAS) have uncovered 1,000s of genetic associations  
31 between regions of the genome and complex traits (Welter *et al.*, 2014), but moving from the  
32 association to identifying the mechanism behind it has proven complicated (Spain and Barrett,  
33 2015). A first step would be to identify the exact variant behind the association, as exact  
34 localisation would allow exploration as to which transcription factor binding sites and regulatory  
35 elements are affected. This, however, is complicated by the fact that most loci tested in GWAS  
36 studies are not directly measured, but instead imperfectly imputed (Marchini and Howie, 2010).  
37 Whole-genome sequence (WGS) data does directly ascertain all genotype calls, but despite falling  
38 costs it is still very expensive on the sample sizes of modern GWAS studies (Supplementary  
39 Table S1). In contrast, studies looking at genetic variants and gene expression (eQTL studies)  
40 have discovered 1,000s of associations using few hundreds of samples, a scale at which collecting  
41 whole genome sequence data is feasible (Lappalainen *et al.*, 2013).

42 In this work we describe analysis combining for the first time two previously published  
43 datasets derived from individuals in the TwinsUK cohort: RNA-seq from four tissues (Brown  
44 *et al.*, 2014; Buil *et al.*, 2015) and WGS from the UK10K project (UK10K Consortium *et al.*,

2015). We explore the properties of causal variants using simulations, leading us to propose the CaVEMaN method (Causal Variant Evidence Mapping using Non-parametric resampling), which estimates the probability that a particular variant is causal. Application of this method allows us to produce a robust set of likely causal SNPs; this could be an important resource for developing methods to call personalised regulatory variants from whole-genome sequence and sequence annotations.

In whole genome sequence every variant is directly measured, the degree to which this increases power to map eQTLs by removing noise from imputation errors is currently unknown. For a simple comparison, we mapped independent eQTLs within 1Mb of the transcription start site for protein coding genes and lincRNAs in four tissues (fat, lymphoblastoid cell lines (LCLs), skin and whole blood) using individuals for which expression, sequence and genotype array data were all available (N from 242 (whole blood) to 506 (LCLs)). Using an eQTL mapping strategy based on stepwise linear regression, we identify 27,659 independent autosomal eQTLs affecting 11,865 genes using whole genome sequence (8,690,715 variants), and 26,351 affecting 11,642 genes using genotypes called from arrays and imputed into the 1000 Genomes Project Phase 1 reference panel (6,263,243 variants) (Figure 1, an analysis of all individuals with expression and WGS data (N from 246-523) and including the X chromosome found 28,141 eQTLs affecting 12,243 genes). This means just a 3.7% increase in discovered eQTLs using WGS; balanced against at least a ten-fold increase in cost of collecting the data, it does not seem a worthwhile exercise yet.

We frequently observe that the lead eQTL variant (LEV, by which we refer to the variant most associated with the trait) differs between the two datasets. As genotypic uncertainty should be reduced for WGS, due to lack of imputation biases, we expect the WGS LEVs to be the causal variant more frequently than LEVs from genotype arrays. To test this hypothesis, we looked for enrichment of WGS-derived LEVs relative to array-genotype-derived in biochemically

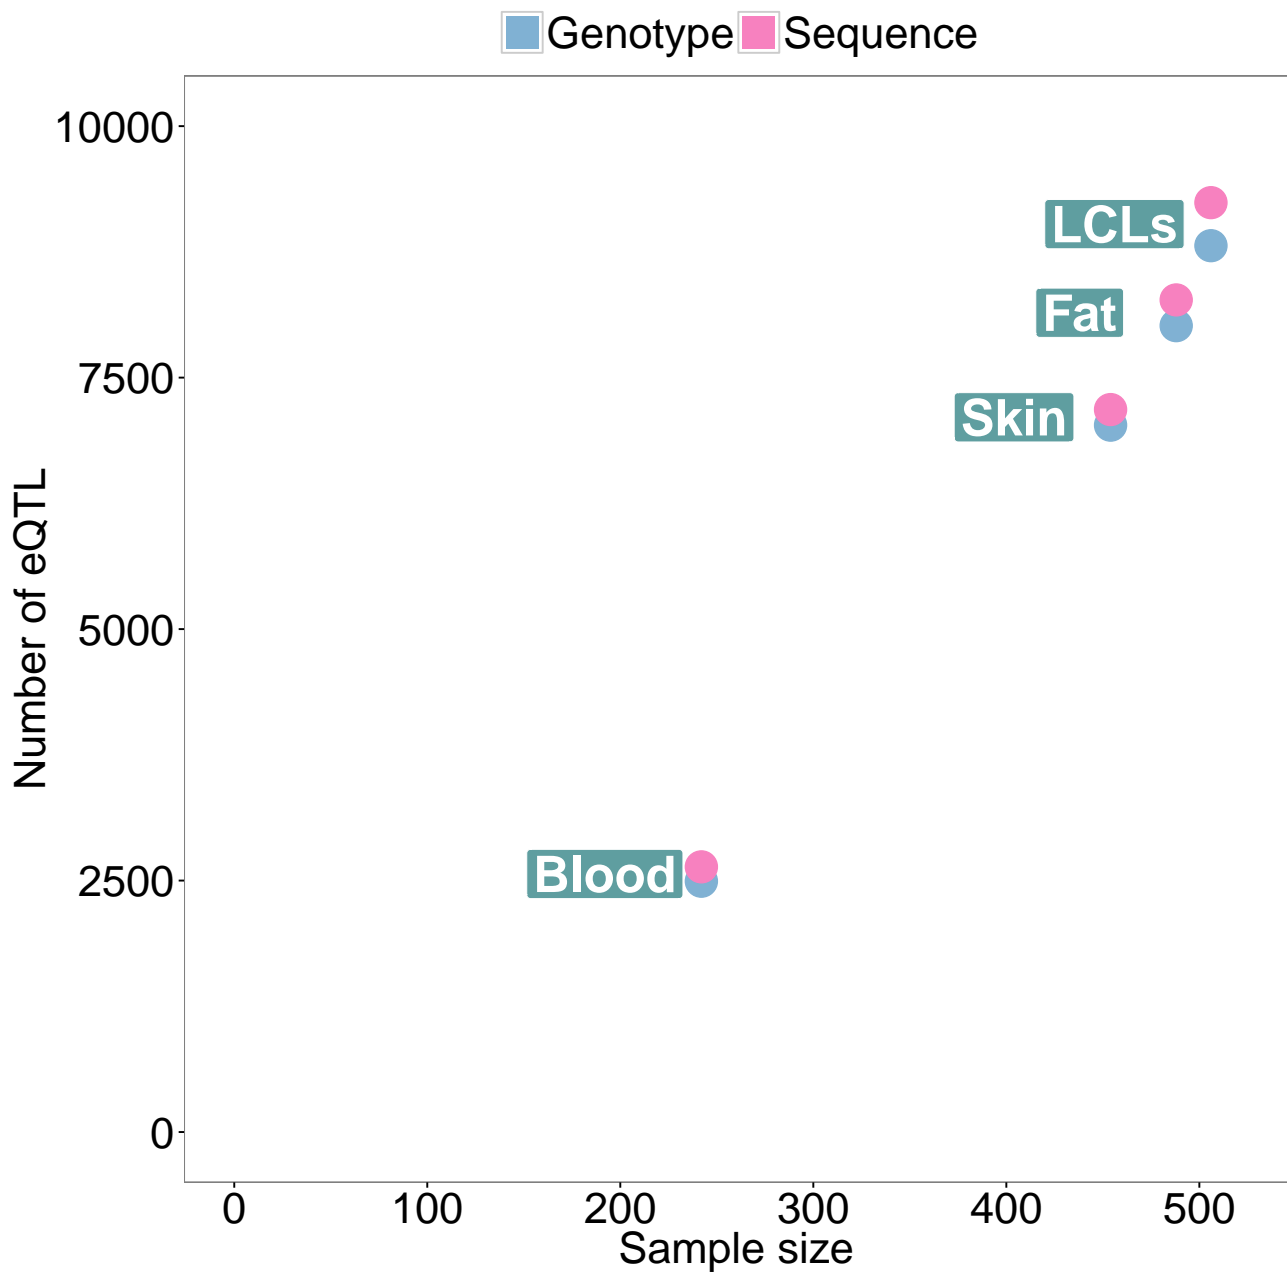

Figure 1: Number of autosomal eQTLs discovered in each tissue when genotype information is provided by arrays imputed into a reference panel and by whole genome sequencing. There is a modest (3.7%) increase in the number of eQTL discovered with WGS.

70 active regions of the genome. Indeed, for 30 out of 31 experiments carried out by the Roadmap  
71 Epigenomics consortium (Roadmap Epigenomics Consortium *et al.*, 2015) in relevant tissues,  
72 we see significant enrichment of sequence LEVs compared to genotype LEVs falling in DNase1  
73 hypersensitivity sites (DHS) (Odds ratio, 1.17-1.40, Figure 2). From this we infer that the LEVs  
74 called with sequence are more likely the causal variant.

75 To better understand properties of causal variants we simulated expression datasets where the  
76 causal variant is known, with properties matched to those of the LEVs from the original eQTL  
77 mapping with sequence genotypes (considering effect size, distance to the transcription start  
78 site and minor allele frequency). Repeating the eQTL mapping on these simulated datasets, we  
79 found that in 45% of cases the causal variant was the LEV. This number was consistent across  
80 tissues, despite sample size and power to map eQTLs being much reduced for whole blood  
81 (Supplementary Figure S1). This number is also similar to that obtained from the analysis of  
82 the Geuvadis data (55%), which used a different methodology based on difference in P values  
83 and enrichment in DHS. We also see a rapid decline when looking at lower ranked candidate  
84 variants, with the 10th most associated SNP being only causal in 1% of cases.

85 Our simulations show that across all genes, the LEV is a strong candidate for the causal  
86 variant. However, when considering specific LEVs, causality for that variant will depend on the  
87 linkage disequilibrium structure around the true causal variant and phenotypic uncertainty for  
88 the expression of the gene of interest. For these reasons we developed the CaVEMaN method,  
89 which uses bootstrap methods (Visscher *et al.*, 1996; Lebreton and Visscher, 1998) to estimate the  
90 probability that the LEV is the causal variant (see Supplementary Methods for methodological  
91 details).

92 We have applied the CaVEMaN method to all four tissues and the Geuvadis LCL RNA-  
93 seq data (N = 445, results in Supplementary File 1). The distributions of probabilities that  
94 LEVs are causal are similar across tissues and studies (Figure 3). For 7.5% of the eQTLs the

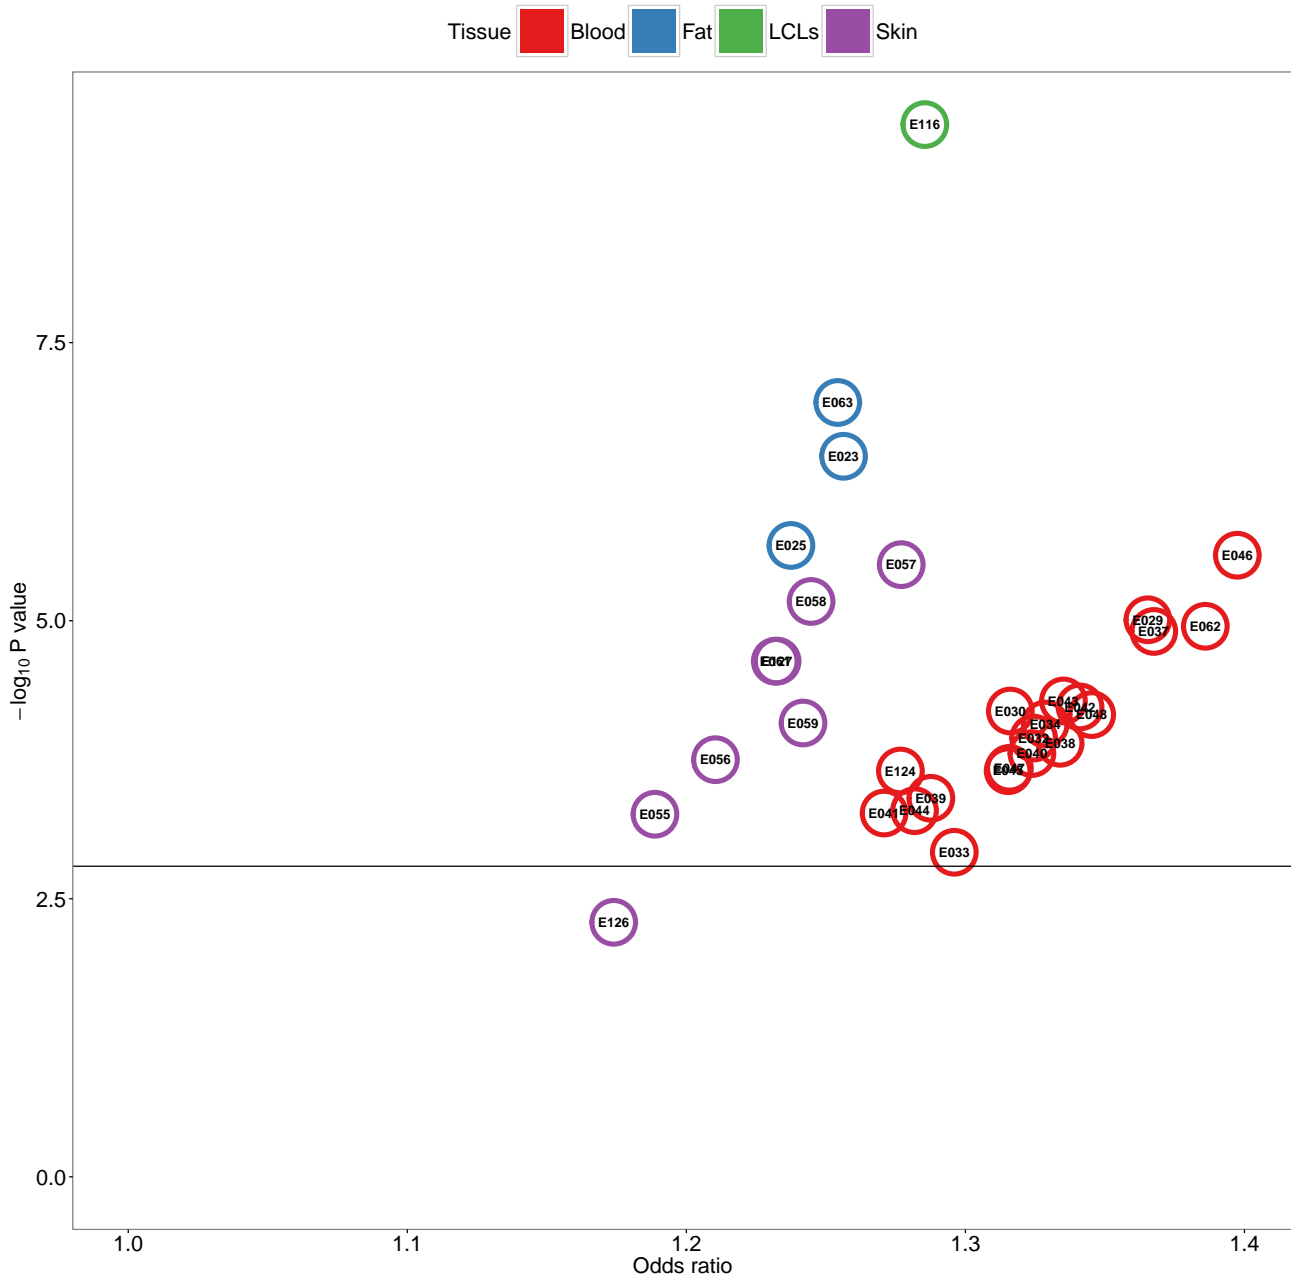

Figure 2: Odds ratio and P value for enrichment of lead eQTL variant called from sequence being located in DNase hypersensitivity sites (Roadmap Epigenomics Consortium *et al.*, 2015) relative to LEVs called from array derived genotypes. A total of 31 experiments related to the tissue from which RNA-seq was collected were analysed, the code given relates to the Roadmap Epigenomics code, Supplementary Table S2 lists the original experiment. All but enrichment of skin eQTL in DHS assayed in NHDF-Ad Adult Dermal Fibroblast Primary Cells were Bonferroni significant ( $P < 0.05$ ).

95 LEV has  $P > 0.8$  of being the causal variant, we refer to these as High Confidence Causal  
96 Variants (HCCVs). For comparison, we applied the Caviar method (Hormozdiari *et al.*, 2014)  
97 to the largest dataset (TwinsUK LCLs), restricting the analysis to all genes with only one eQTL  
98 to remove differences related to inferring presence of multiple eQTLs. Caviar, along with with  
99 equivalent Bayesian methods (Chen *et al.*, 2015; Benner *et al.*, 2016; Servin and Stephens, 2007),  
100 have previously been suggested as fine-mapping methods for estimating credible sets of SNPs  
101 with a given probability of containing the causal variant. There was good agreement on the  
102 causal probabilities of the LEV (spearman  $\rho = 0.856$ ,  $P < 10^{-216}$ , Supplementary Figure S3),  
103 but the Caviar method produced more conservative estimates of the causal probabilities (median  
104 probability 0.12 vs 0.29).

105 To understand more about the relationship between causal regulatory variation and active  
106 genomic regions found by ChIP-seq in single individuals, we integrated our causal probabilities  
107 with DHSs from the Roadmap Epigenomics consortium. Figure 4 shows a simple linear relation-  
108 ship between the causal probability of the LEV and the probability that the LEV is located in  
109 a DHS. We can exploit the linear relationship to estimate the proportion of regulatory variants  
110 with causal probability 1 that lie within DHS identified by particular experiments. Figure 5  
111 shows that for all tissues except blood, only a minority of regulatory variants lie within DHS  
112 called by specific experiments. Blood eQTL, discovered in a smaller sample size than the other  
113 tissues, are more likely to have larger effect sizes and thus affect promoter activity, this is a  
114 possible explanation for the observed greater enrichment. It would be interesting to see whether  
115 when CaVEMaN is applied to larger eQTL datasets, with the power to discover eQTLs with  
116 more subtle effects, the proportion of causal regulatory variants in DHSs will be even lower, im-  
117 plying a limited utility of these regulatory annotations for interpretation of enhancer and weaker  
118 regulatory variants.

119 It is widely known that associations with whole organism traits, as discovered by GWAS, are

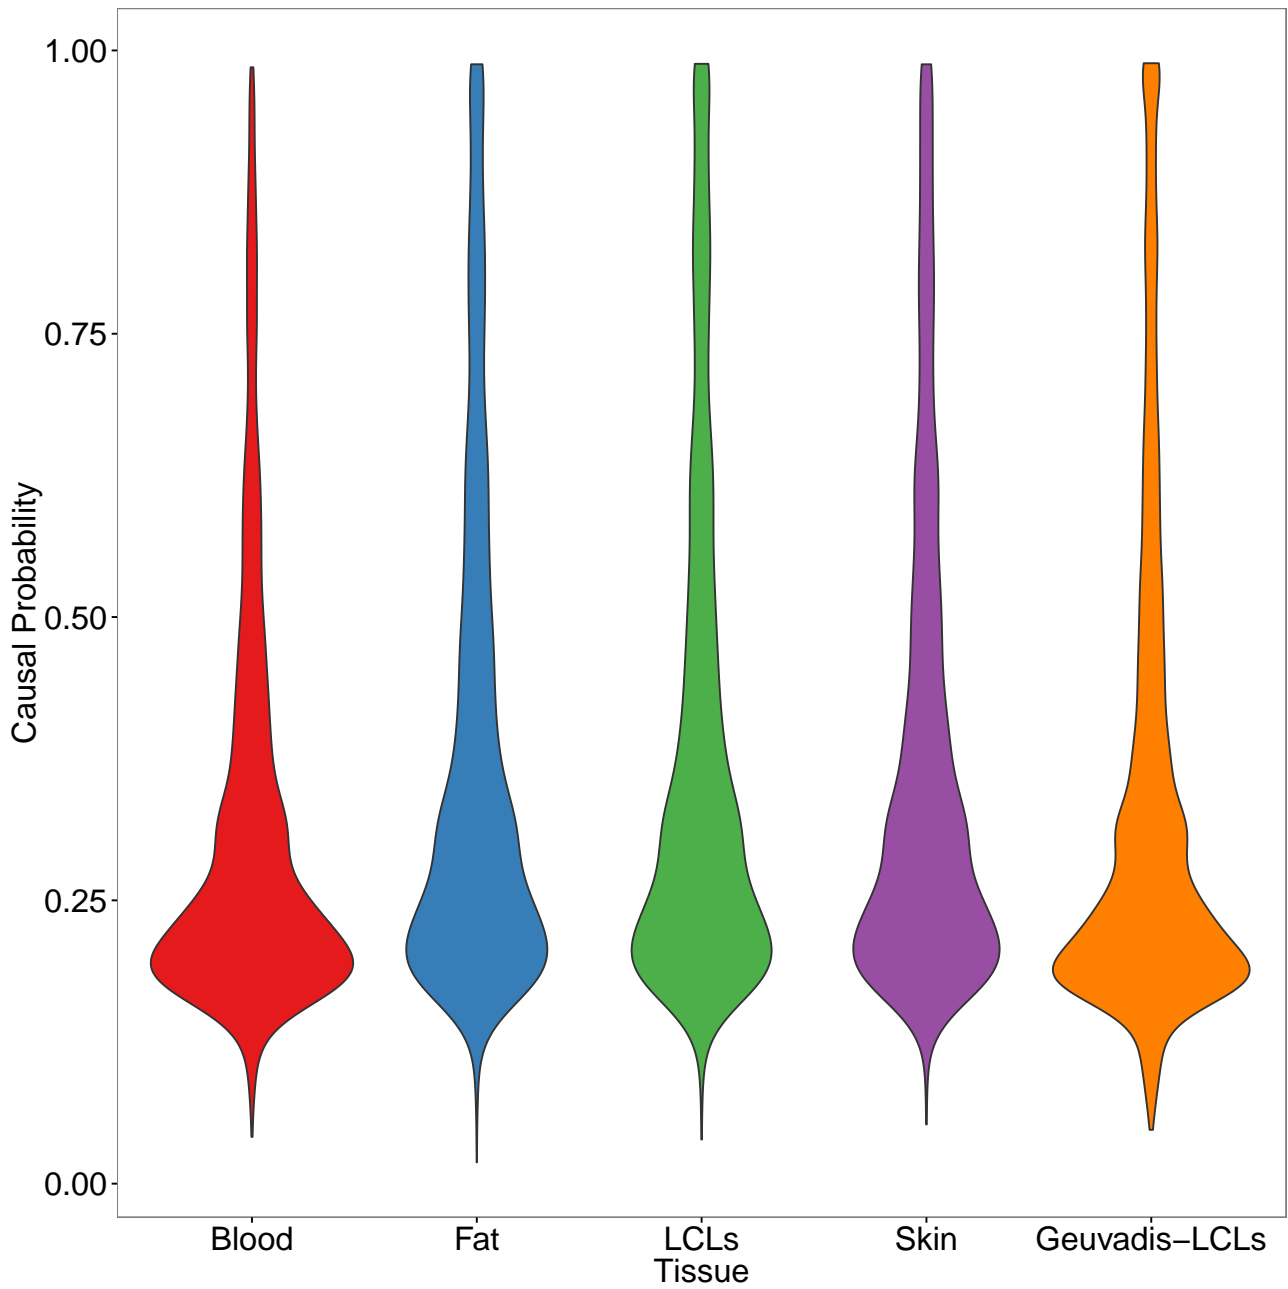

Figure 3: Distribution of the CaVEMaN estimated causal probabilities for all lead eQTLs, broken down by tissue.



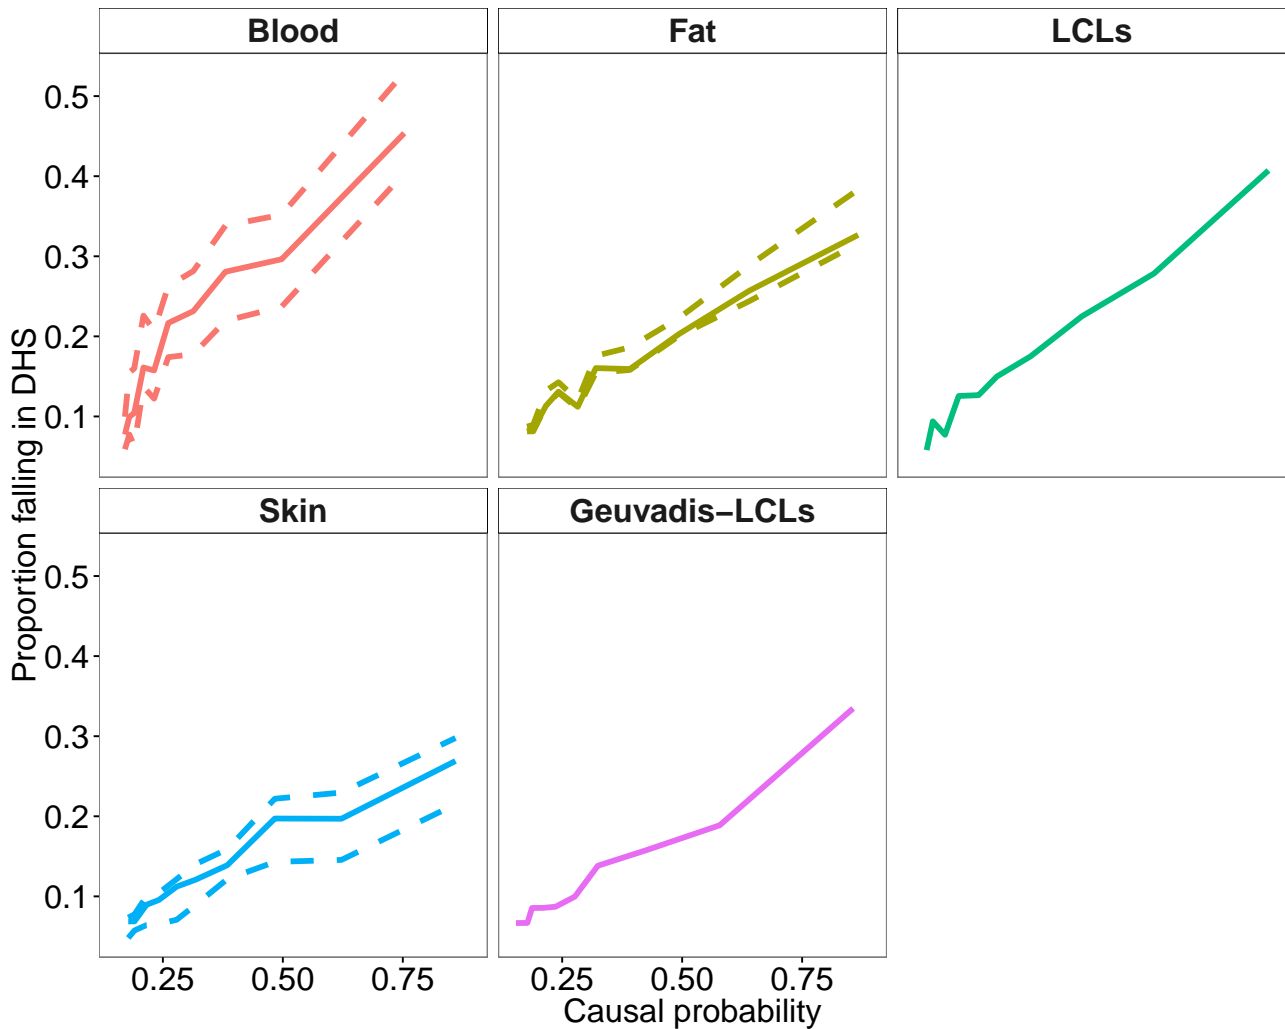

Figure 4: Probability of falling into a DHS is proportion to the CaVEMaN estimated causal probability. The complete line represents the median result across experiments, where there are more than one experiment for a given tissue, the dotted lines give the maximum and minimum across tissues. A full list of experiments can be found in Supplementary Table S2.

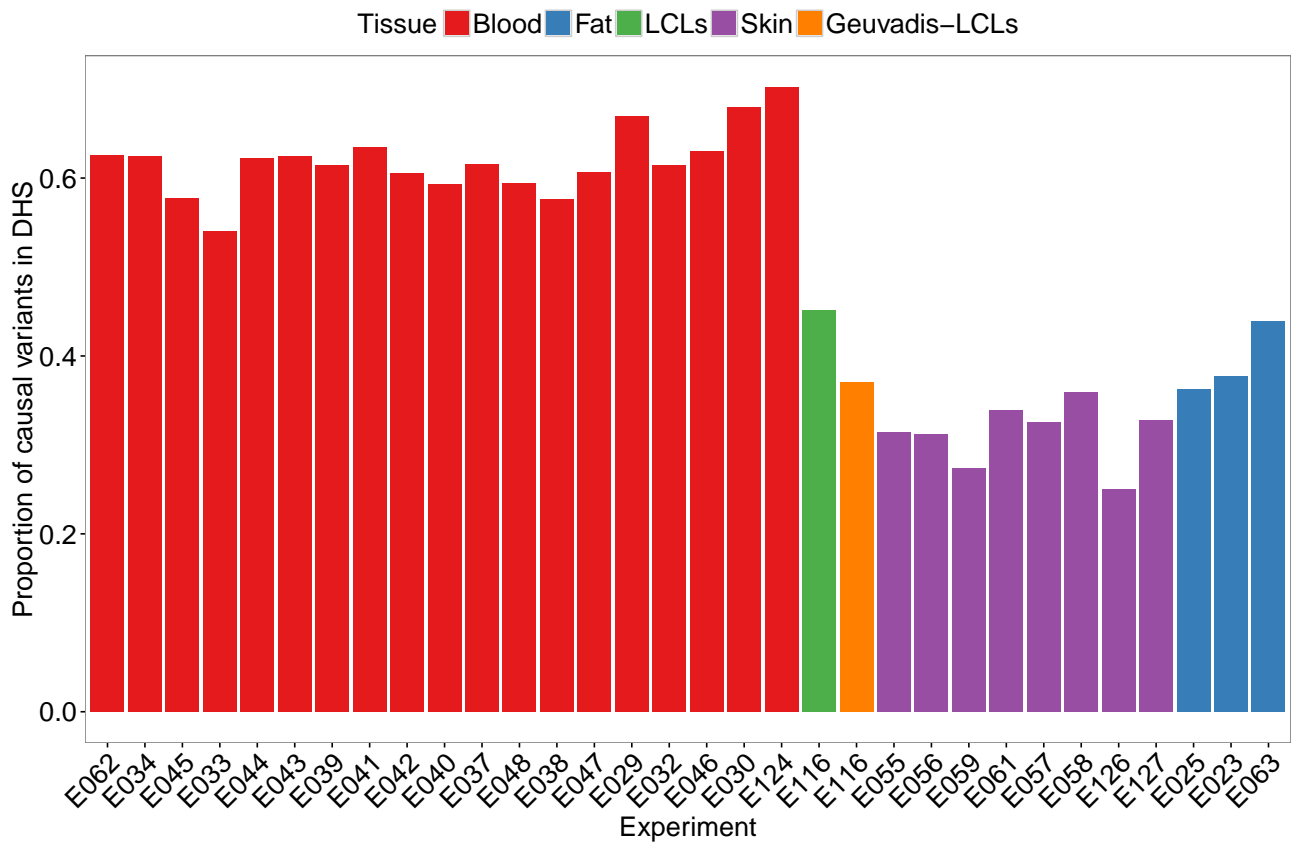

Figure 5: Estimated proportion of functional variants falling into regions identified by single ChIP-seq experiments.

120 enriched in eQTL (Manolio *et al.*, 2009); by defining a set of eQTL where the causal variant is  
121 known we can pinpoint variants which could show greater enrichment (a shared GWAS-eQTL  
122 signal would not be diluted by linkage). In addition, by providing both a mediating gene and  
123 a variant causative for the expression signal, it is possible these results can provide a more  
124 mechanistic understanding of the GWAS signal. By using publicly available GWAS summary  
125 statistics from 16 studies (see Supplementary materials), we extracted P values for association  
126 for all of the LEVs and saw greater enrichment of small P values for HCCVs compared to all  
127 other eQTLs ( $\pi_1 = 16.2$  compared with  $\pi_1 = 14.0$ , estimated using qvalue (Storey *et al.*, 2015)).  
128 Greater enrichment was also observed when considering the proportion of shared signals between  
129 GWAS associations with  $P < 5 \times 10^{-8}$  listed in the NHGRI catalogue and eQTL falling in the  
130 same recombination hotspot (16.0% of proximal HCCVs and GWAS associations were shared,  
131 compared to 2.49% for all other eQTLs, estimated using the Regulatory Concordance method,  
132 RTC, (Nica *et al.*, 2010; Ongen *et al.*, 2016a)). Considering all HCCVs with a Bonferroni  
133 significant GWAS association ( $P < 3 \times 10^{-6}$ ), we found associations between 53 eQTL and 65  
134 GWAS traits (Figure 6, Supplementary File 2).

135 Given these examples of variants with highly confident causal effects on expression and  
136 statistical associations with GWAS traits, functional evidence connecting the expression of the  
137 gene with the trait would also implicate a causal link between variant and trait. For example,  
138 a HCCV (rs10274367) associated with *GPER* in is also associated with levels of high-density  
139 lipoprotein (HDL) cholesterol. Female knock-out mice for the gene also show a decrease in  
140 HDL levels (Sharma *et al.*, 2013). We also found rs1805081 to be both a HCCV for *NPC1*,  
141 as well as the lead associated variant with BMI in a large GWAS study (Meyre *et al.*, 2009).  
142 Heterozygous mouse models (*Npc1*+/-), where the gene is expressed at half normal levels, observe  
143 large weight gain on high fat diets but not on low fat diets (Jelinek *et al.*, 2010, 2011), and it  
144 has also been observed that higher levels of *NPC1* in human adipose tissue normalise after

145 bariatric surgery and behavioural modification (Bambace *et al.*, 2013). In this example, the  
146 expression of *NPC1* is modified by rs1805081 and hypothesised to be a response to changes in  
147 BMI. Expression changes in *NPC1* then seem to be part of a compensatory mechanism to modify  
148 the weight gain due to dietary excesses and the result of diet-by-genotype interactions. Finally,  
149 rs4702 is a HCCV affecting expression of the *FURIN* gene in our analysis and was the lead  
150 variant in the GWAS study of schizophrenia (Schizophrenia Working Group of the Psychiatric  
151 Genomics, 2014). Following up this association, altering the expression of *FURIN* was seen to  
152 produce neuro-anatomical deficits in zebrafish and abnormal neural migration in human induced  
153 pluripotent stem cells (Fromer *et al.*, 2016).

154 In summary, we have produced a method to estimate the probability that the lead eQTL  
155 variant is the causal variant. We have used this method to estimate the effectiveness of ChIP-seq  
156 experiments from a single individual in predicting regions which harbour regulatory variation,  
157 and also to suggest variants which may be causal for GWAS associations. This method could also  
158 be applied to GWAS studies, to learn candidate causal variants for whole organism traits. It is  
159 clear that pinpointing the causal variant in such studies will not only facilitate the integration of  
160 these association signals with mechanistic regulatory interactions and likely upstream regulators,  
161 but will also allow the development of interpretation methods from genome sequence alone once  
162 a large number of representative causal variants have been discovered.

## 163 **Acknowledgments**

164 We would like to thank Nikolaos Lykoskoufis for his help with the enrichment analysis. This  
165 work has been supported by grants from the NIH-NIMH (GTEx), European Commission (Di-  
166 rect project), Louis Jeanet Foundation, Swiss National Science Foundation and SystemsX. The  
167 TwinsUK study was funded by the Wellcome Trust; European Communitys Seventh Frame-  
168 work Programme (FP7/2007-2013). The study also receives support from the National Institute

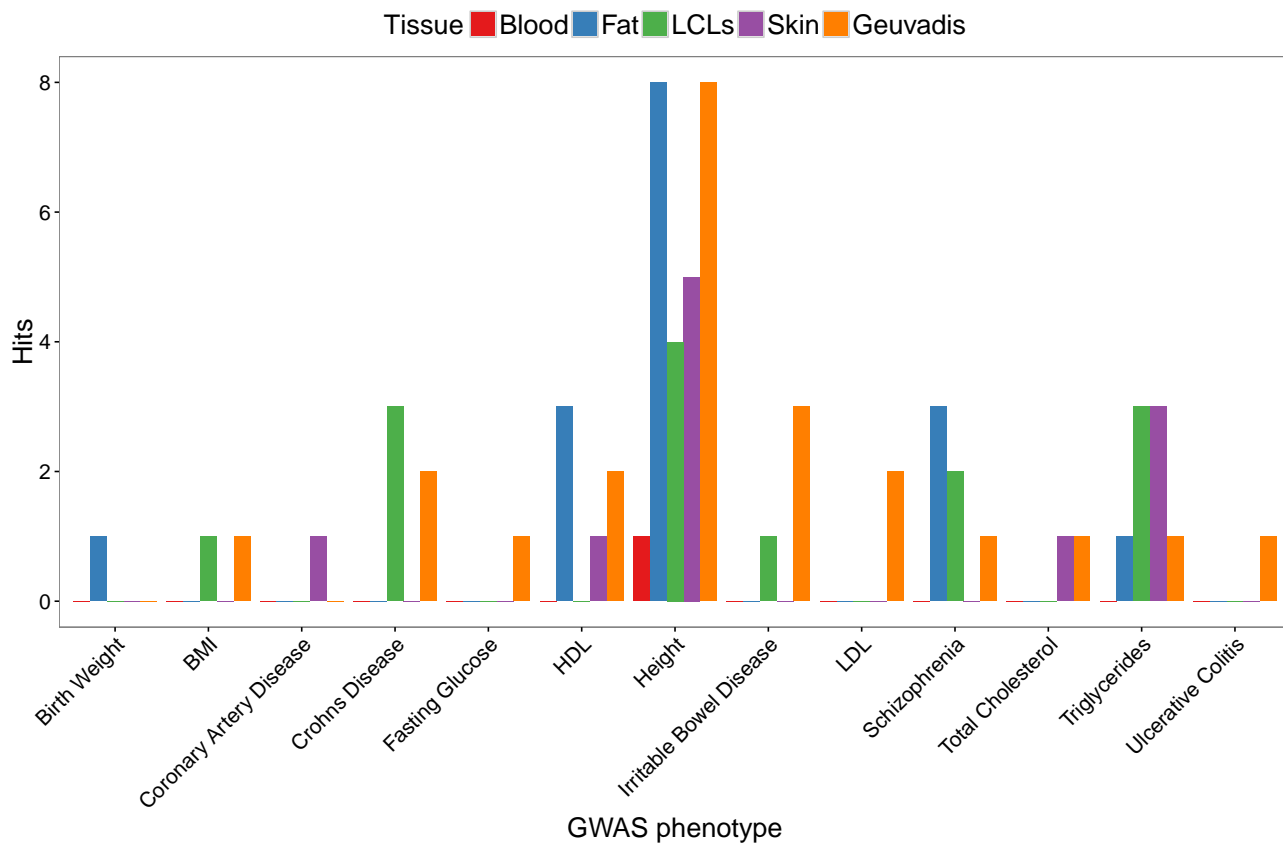

Figure 6: Numbers of significant associations between HCCVs and GWAS traits, divided by tissue type.

169 for Health Research (NIHR)- funded BioResource, Clinical Research Facility and Biomedical  
170 Research Centre based at Guy's and St Thomas' NHS Foundation Trust in partnership with  
171 King's College London. SNP genotyping was performed by The Wellcome Trust Sanger Insti-  
172 tute and National Eye Institute via NIH/CIDR. This study makes use of the data generated by  
173 the UK10K Consortium. Funding for UK10K was provided by the Wellcome Trust under award  
174 WT091310. A full list of the investigators who contributed to the generation of the data is avail-  
175 able at [www.UK10K.org](http://www.UK10K.org). Computation was performed at the Vital-IT (<http://www.vital-it.ch>)  
176 Center for high-performance computing of the SIB Swiss Institute of Bioinformatics.

## 177 **Supplementary materials**

### 178 **TwinsUK data**

#### 179 **Expression**

180 RPKM expression quantifications used in this paper have been previously analysed (Brown *et al.*,  
181 2014; Buil *et al.*, 2015). In short, eight hundred and fifty-six female twins were recruited from  
182 the TwinsUK Adult twin registry and punch biopsies (8 mm) were taken from a photo-protected  
183 area adjacent and inferior to the umbilicus. Subcutaneous adipose tissue was separated from skin  
184 tissue, and both samples were weighed and immediately stored in liquid nitrogen. Peripheral  
185 blood samples were also collected, and the European Collection of Cell Cultures agency generated  
186 LCLs by transforming the B-lymphocyte component using the Epstein-Barr virus. The Illumina  
187 TruSeq sample preparation kit (Illumina, San Diego, CA) was used to prepare samples according  
188 to manufacturer's instructions, which were then sequenced on a HiSeq2000 machine. The 49-  
189 bp sequenced paired-end reads were mapped to the GRCh37 reference genome (Lander *et al.*,  
190 2001) with bwa v0.5.9 (Li and Durbin, 2009). Genes were quantified using the GENCODE v10  
191 annotation (Harrow *et al.*, 2012), and genes defined as protein coding or long non-coding RNA  
192 (linc RNA) with less than 10% zero read count were kept. RPKM values were scaled and centred  
193 to have mean 0, variance 1 and the first 25 principal components were removed from the whole  
194 blood expression and 50 from the other tissues (choice of number of PCs was made a priori  
195 based on sample size). Family structure was removed by taking the residuals of an lme4 model  
196 (Bates *et al.*, 2014) in which family and zygosity were modelled using random effects. Finally,  
197 to remove outlier effects, expression quantifications for each gene were mapped onto a normal  
198 distribution with mean 0 and variance 1.

## 199 **Genotyping and genome sequencing.**

### 200 **Genotypes called from arrays**

201 A combination of the HumanHap300, HumanHap610Q, 1M-Duo and 1.2MDuo Illumina arrays  
202 were used to genotype samples. This data was then pre-phased using IMPUTE2 (Howie *et al.*,  
203 2012) and then imputed using the 1000 Genomes Project Phase 1 reference panel (data freeze 10  
204 November 2010, (Abecasis *et al.*, 2012)). For analysis the genotypes were filtered, leaving SNPs  
205 with minor allele frequency  $> 0.01$  and IMPUTE info value  $> 0.8$ . This data has previously  
206 been analysed (Brown *et al.*, 2014; Buil *et al.*, 2015).

### 207 **Genotypes called from sequencing**

208 The vcf files, produced by the UK10K consortium (UK10K Consortium *et al.*, 2015), were  
209 downloaded from the [European Genome-phenome Archive](#). When one monozygotic twin in  
210 the sample had been sequenced, the same sequence data was used for the genetically identical  
211 sibling. Of the 856 individuals with expression, 552 has available sequence data. For multiallelic  
212 variants, dosage was calculated as 2 number of copies of the most common allele. Variants were  
213 filtered if the major allele had a frequency  $> 0.99$ .

### 214 **Ethics statement**

215 The St. Thomas' Research Ethics Committee (REC) approved on 20 September 2007 the pro-  
216 tocol for the dissemination of data, including DNA, with REC reference number RE04/015.  
217 On 12 March 2008, the St Thomas' REC confirmed that this approval extended to expression  
218 data. Volunteers gave informed consent and signed an approved consent form before the biopsy  
219 procedure. Volunteers were supplied with an appropriate detailed information sheet regarding  
220 the research project and biopsy procedure by post before attending for the biopsy. Consent to  
221 link the RNA-seq data with the whole genome sequence data was approved by the TwinsUK

222 Resource Executive Committee (TREC) on 22nd April 2015.

## 223 **Geuvadis data**

224 BAM files for the RNA-seq were downloaded from EBI ArrayExpress, accession code **E-GEUV-**  
225 **3**. These files were mapped to the GRCh37 reference genome (Lander *et al.*, 2001) using GEM  
226 version 1.7.1 (Marco-Sola *et al.*, 2012), and protein coding and linc RNAs were quantified using  
227 the GENCODE v19 annotation (Harrow *et al.*, 2012). Population group was regressed out of  
228 RPKM values as fixed effects in a linear model, values were then centred and scaled to mean  
229 0, variance 1, and 50 principal components were removed. Genotype vcf files from phase 3 of  
230 the 1000 Genomes project (1000 Genomes Project Consortium *et al.* 2015) were downloaded  
231 from the **1000 Genomes website**. In non-pseudo autosomal regions of the X chromosome, male  
232 dosage was calculated as twice the number of copies of the alternate allele (hence treating it as  
233 homozygous with two copies). A minor allele frequency cut off of 0.01 was applied.

## 234 **eQTL mapping**

235 eQTLs were mapped using fastQTL (Ongen *et al.*, 2016b). To discover multiple independent  
236 eQTLs a stepwise regression procedure was applied. Firstly, for each tissue, fastQTL was run  
237 with 10,000 permutations to discover a set of eGenes (FDR < 0.01). Then, the maximum  
238 beta-adjusted P value (correcting for multiple testing across the SNPs) over these genes was  
239 taken as the gene-level threshold. The next stage proceeded iteratively for each gene. At each  
240 iteration a cis scan of the window was performed, using 10,000 permutations and correcting for  
241 all previously discovered SNPs. If the beta adjusted P value for the LEV was not significant  
242 at the gene-level threshold, the forward stage was complete and the procedure moved on to the  
243 backward step. If this P value was significant, the LEV was added to the list of discovered  
244 eQTLs as an independent signal and the forward step proceeded to the next iteration.



245 Once the forward stage was complete for a given gene, a list of associated SNPs was produced  
246 which we refer to as forward signals. The backwards stage consisted of testing each forward signal  
247 separately, controlling for all other discovered signals. To do this, for each forward signal we ran  
248 a cis scan over all variants in the window using fastQTL, fitting all other discovered signals as  
249 covariates. If no SNP is significant at the gene-level threshold the signal being tested is dropped,  
250 otherwise the LEV from the scan was chosen as the variant that represented the signal best in  
251 the full model.

## 252 **Enrichment analysis**

253 Bed files listing DNase hypersensitivity sites, produced by the Roadmap Epigenomics consortium  
254 (Roadmap Epigenomics Consortium et al. 2015), were downloaded from the [NCBI ftp site](#).  
255 Experiments were linked to tissues from which RNA-seq was available using Table S2. Over each  
256 ChIP-seq RNA-seq combination, the odds ratio for enrichment was calculated from the number  
257 of LEVs called using sequence and the number of LEVs called using array-based genotypes falling  
258 within regions called in the experiment and the total numbers of eQTLs. A Fishers Exact test  
259 was performed to test the hypothesis that equal proportions of sequence and genotype LEVs  
260 were falling in these regions.

## 261 **Simulations**

262 For all discovered, independent eQTLs, the LEV for association was identified and its minor  
263 allele frequency and distance to the transcription start site calculated. In addition, beta and  
264 sigma coefficients from a regression of expression on the LEV were also estimated. Then a  
265 matched SNP was chosen, with a distance to transcription start site of a protein coding or linc  
266 RNA gene within 1 kb of the original, and minor allele frequency within 0.025. Then, simulated  
267 expression was produced by multiplying SNP genotype by beta and adding a random normally

268 distributed term with a standard error of sigma. Five simulated datasets were produced for each  
269 TwinsUK tissue, eQTL mapping was applied to each looking only for primary eQTLs, and the  
270 rank of the nominal P value for association was collected.

## 271 CaVEMaN

272 Firstly, we used the simulations to estimate the probability the causal variant would be the  $i$ th  
273 ranked SNP in an eQTL mapping by calculating the proportion of times this occurred across all  
274 tissues and simulations (this quantity is denoted  $p_i$ , Supplementary Figure S1). As CaVEMaN  
275 focuses on the top 10 ranked variants from an eQTL analysis,  $p_i$ ,  $i$  from 1 to 10, were normalised  
276 to sum to 1.

277 CaVEMaN is based on the premise that there is exactly one genetic signal in the cis window  
278 of the gene. For the cases where multiple eQTLs have been discovered for a given gene, we  
279 created new single signal expression phenotypes. For each eQTL this was made by regressing  
280 out all other eQTLs discovered for the gene, preserving only one genetic signal.

281 This new matrix of expression data was sampled with replacement 10,000 times to create  
282 10,000 new datasets of the same size. A cis eQTL mapping was run on each of these 10,000  
283 datasets, and the proportion of times a given SNP was ranked  $i$ ,  $I$  from 1 to 10 was calculated  
284 (denoted  $F_i$ , this is an estimate of the probability that SNP would be the rank  $i$  most associated  
285 SNP). The CaVEMaN score was then defined as  $\sum_i^{10} p_i F_i$ .

286 Finally, we further exploited the simulations to calibrate the CaVEMaN score of the LEV.  
287 CaVEMaN was run on all simulated data. Then, across all simulated datasets (removing blood  
288 as this was an outlier resulting in less conservative estimates of causal probabilities) we divided  
289 the CaVEMaN scores of the LEVs into twenty quantiles. Within each quantile, we calculated  
290 the proportion of times the lead SNP was the causal SNP and then drew a monotonically  
291 increasing smooth spline from the origin, through the 20 quantiles, to the point (1, 1) using

292 the `gsl` interpolate functions with the `steffen` method (`gsl-2.1`, Supplementary Figure S2). This  
293 function provides our mapping of CaVEMaN score of the lead SNP onto causal probabilities,  
294 and we applied this function to the CaVEMaN scores of the LEV to estimate their causal  
295 probabilities.

296 Code for correcting the expression datasets for multiple eQTLs, running the CaVEMaN  
297 method and converting the CaVEMaN score to a causal probability can be found here:

298 <https://github.com/funpopgen/CaVEMaN>.

## 299 Caviar

300 For genes with an eQTL in LCLs, we applied Caviar (Hormozdiari *et al.*, 2014) to produce  
301 another estimate of causal variant probability for comparison. As Caviar is limited in the  
302 number of SNPs it can analyse, we first extracted all variants with  $P < 0.01$ , up to the first 50.  
303 The Z scores for these variants were produced, with the correlation matrix of these SNPs, and  
304 Caviar was run with the default settings.

## 305 GWAS analysis

306 We have downloaded the GWAS summary statistics for 16 different GWAS traits: autism (Robin-  
307 son *et al.*, 2016), birth weight (Horikoshi *et al.*, 2016), body mass index (analysing all ancestries)  
308 (Locke *et al.*, 2015), coronary artery disease (Nikpay *et al.*, 2015), Crohns disease (Liu *et al.*,  
309 2015), diabetes (Fuchsberger *et al.*, 2016), fasting glucose (Manning *et al.*, 2012), fasting insulin  
310 (Manning *et al.*, 2012), height (Wood *et al.*, 2014), high-density lipoprotein (Global Lipids Ge-  
311 netics Consortium *et al.*, 2013), irritable bowel disease (Liu *et al.*, 2015), low-density lipoprotein  
312 (Global Lipids Genetics Consortium *et al.*, 2013), schizophrenia (Schizophrenia Working Group  
313 of the Psychiatric Genomics, 2014), total cholesterol (Global Lipids Genetics Consortium *et al.*,  
314 2013), triglycerides (Global Lipids Genetics Consortium *et al.*, 2013), and ulcerative colitis (Liu

| Study              | Trait           | Sample size | Associations | Estimated Cost* |
|--------------------|-----------------|-------------|--------------|-----------------|
| GIANT              | BMI             | 339,224     | 97           | \$339,224,000   |
| PGC                | Schizophrenia   | 150,064     | 128          | \$150,064,000   |
| MAGIC              | Glycemic traits | 133,010     | 53           | \$133,010,000   |
| TwinsUK expression | LCL expression  | 814         | 9,555        | \$814,000       |

Table S1: Estimated costs of collecting whole genome sequence data at GWAS scale relative to expression (WGS is generously priced at \$1,000 a genome). Twins UK expression refers to the study published in Buil *et al.* (2015).

315 *et al.*, 2015). For all LEVs, the P value for each trait was extracted (if available) and the  
316 qvalue package (Storey *et al.*, 2015) was used to estimate  $\pi_1 = 1 - \pi_0$ , the proportion of of  
317 alternate hypotheses (i.e., association between variant and GWAS trait). Finally, Bonferroni  
318 significant GWAS associations for HCCVs were reported, controlling for multiple testing across  
319 all phenotypes and variants.

320 In addition, we downloaded the NHGRI-EBI Catalog of reported genome-wide significant  
321 associations from the [EBI website](#) on the 27<sup>th</sup> September 2016 and removed all with  $P > 5 \times 10^{-8}$   
322 and where the variant was not listed in dbSNP build 148 (Sherry *et al.*, 2001), leaving 11,636  
323 reported associations. RTC, as implemented in QTLtools (Delaneau *et al.*, 2016), was applied  
324 with the default settings to look for sharing of these GWAS variants with the discovered eQTLs.  
325 As the RTC statistic is uniformly distributed under the null hypothesis of two separate causal  
326 loci, independently located within the hotspot, 1 - RTC can be interpreted as a P value for a  
327 shared causal variant. The qvalue package (Storey *et al.*, 2015) was then used to estimate  $\pi_1$ ,  
328 the proportion of GWAS/eQTLs signals in the same recombination interval which were caused  
329 by the same underlying variants.

330

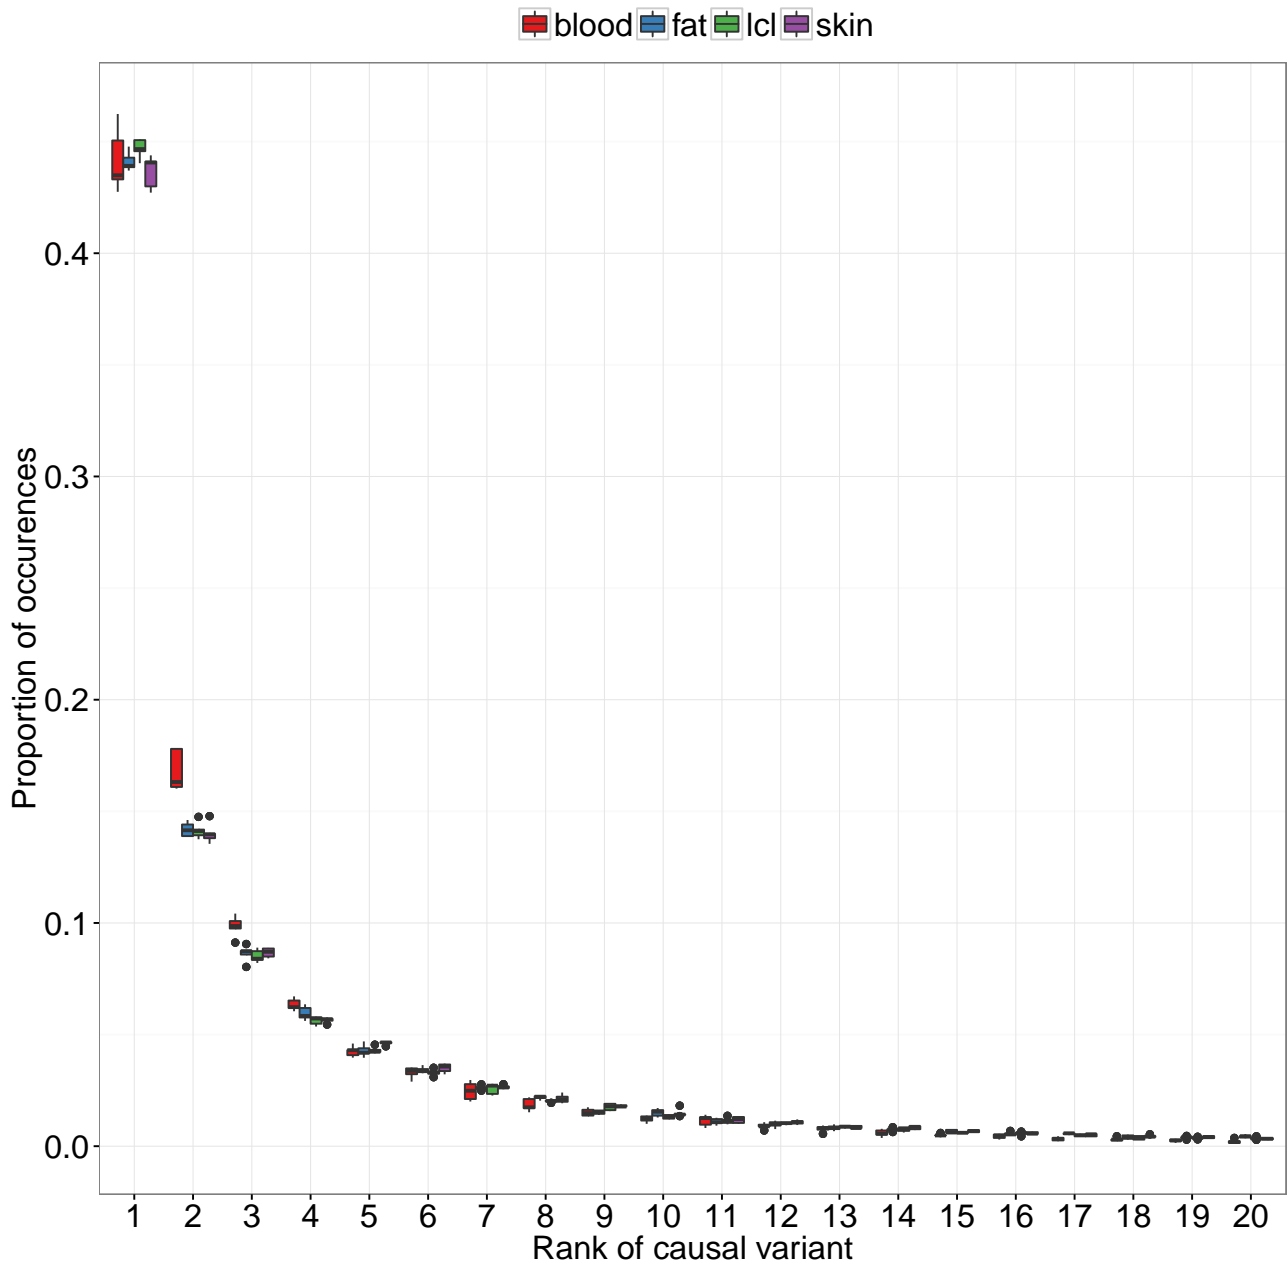

Figure S1: Based on 5 simulations per tissue, the x axis shows the rank of the causal variant, and the y axis the proportion of times this outcome occurred. We notice that, as the whole blood experiment was smaller than the other experiments, sample size does not seem to affect the distribution.

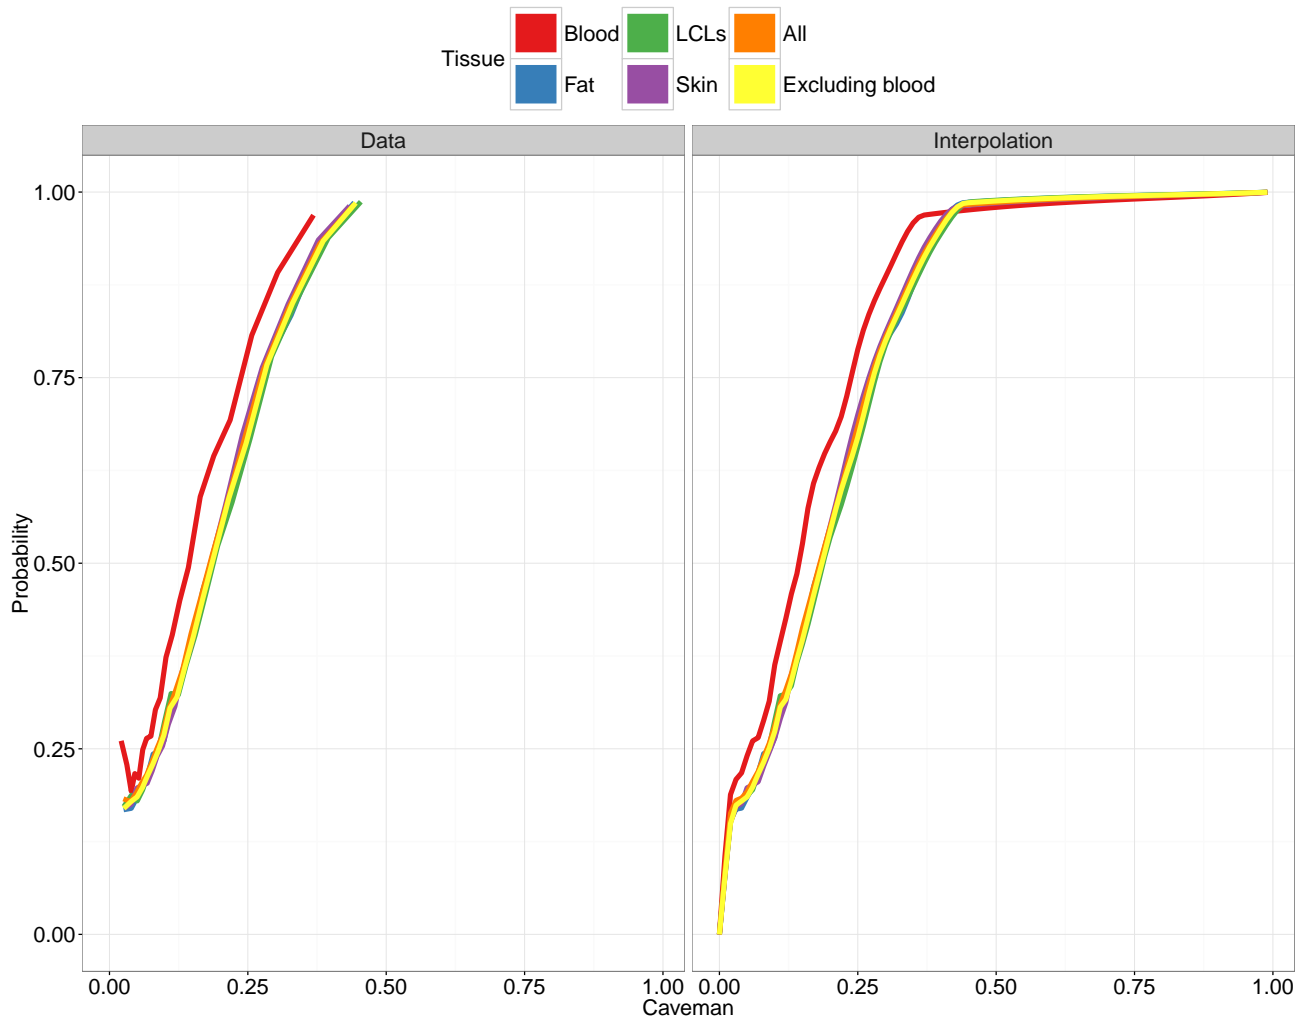

Figure S2: The CaVEMaN score is calibrated using the simulations to estimate the probability that the LEV is causal. The estimated calibration functions are consistent across tissues, with the exception of blood which is less conservative than the other tissues.

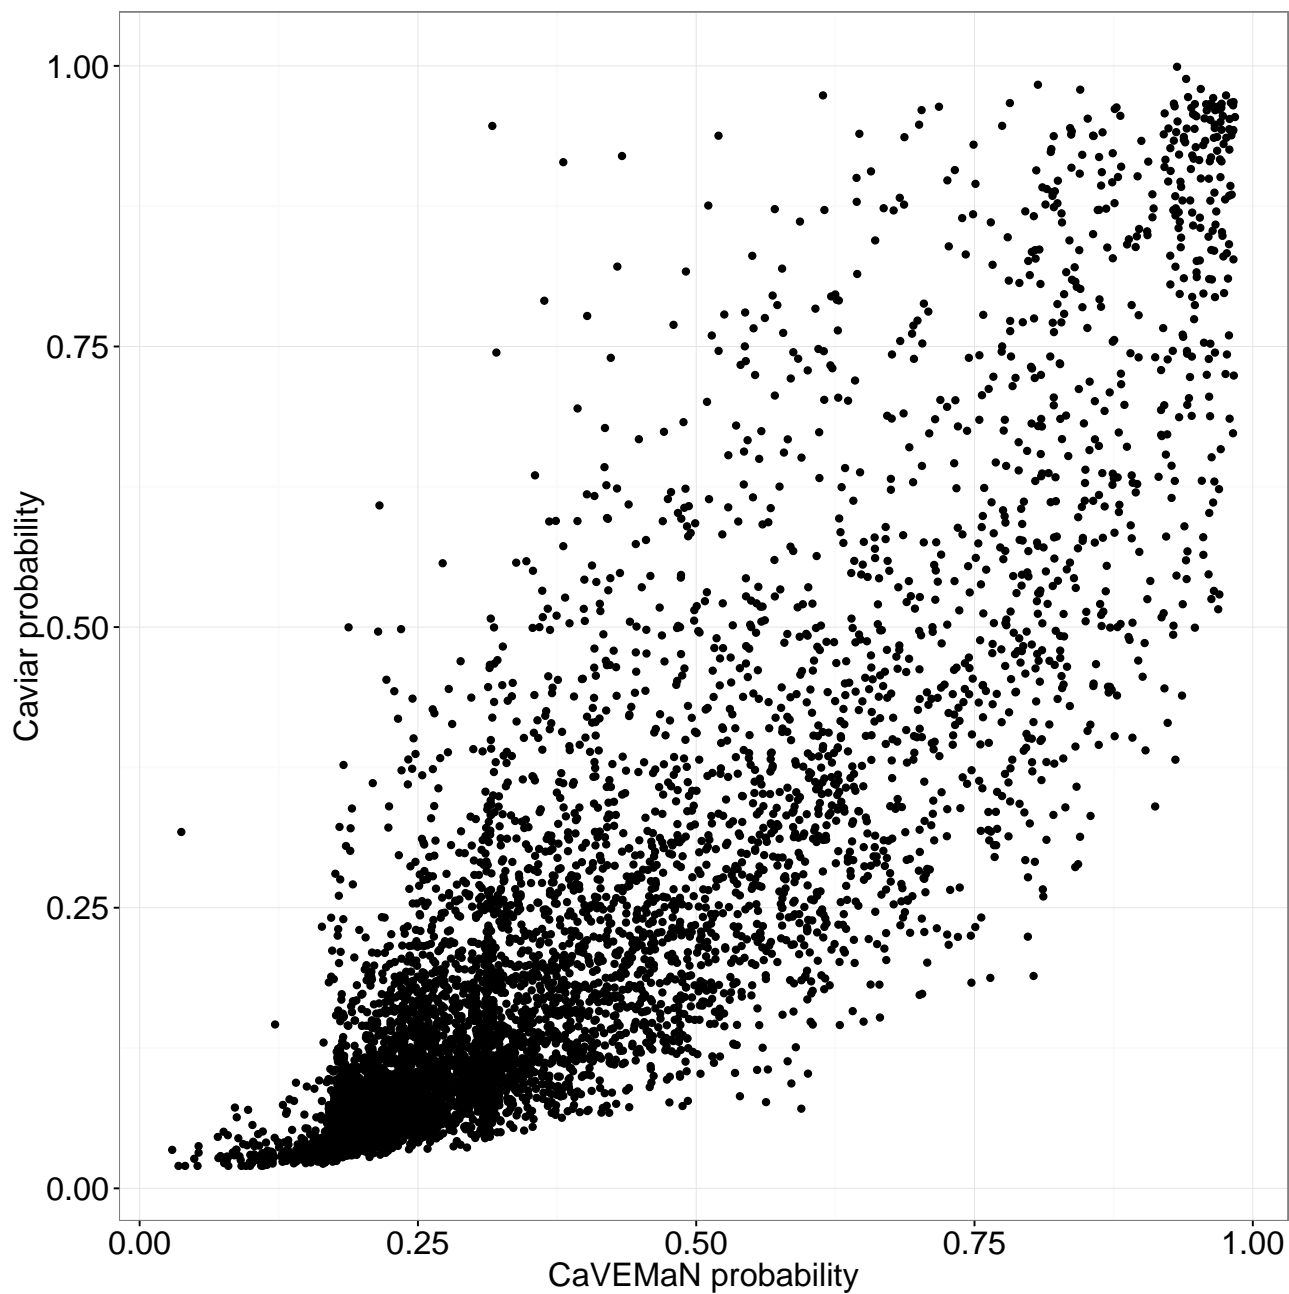

Figure S3: CaVEMaN scores compared to Caviar probabilities for genes with only one eQTL.

| Roadmap Epigenomics experiment                                 | RNA-seq tissue       | Roadmap Epigenomics code |
|----------------------------------------------------------------|----------------------|--------------------------|
| Primary mononuclear cells from peripheral blood                | Whole blood          | E062                     |
| Primary T cells from peripheral blood                          | Whole blood          | E034                     |
| Primary T cells effector/memory enriched from peripheral blood | Whole blood          | E045                     |
| Primary T cells from cord blood                                | Whole blood          | E033                     |
| Primary T regulatory cells from peripheral blood               | Whole blood          | E044                     |
| Primary T helper cells from peripheral blood                   | Whole blood          | E043                     |
| Primary T helper naive cells from peripheral blood             | Whole blood          | E039                     |
| Primary T helper cells PMA-I stimulated                        | Whole blood          | E041                     |
| Primary T helper 17 cells PMA-I stimulated                     | Whole blood          | E042                     |
| Primary T helper memory cells from peripheral blood 1          | Whole blood          | E040                     |
| Primary T helper memory cells from peripheral blood 2          | Whole blood          | E037                     |
| Primary T CD8+ memory cells from peripheral blood              | Whole blood          | E048                     |
| Primary T helper naive cells from peripheral blood             | Whole blood          | E038                     |
| Primary T CD8+ naive cells from peripheral blood               | Whole blood          | E047                     |
| Primary monocytes from peripheral blood                        | Whole blood          | E029                     |
| Primary B cells from peripheral blood                          | Whole blood          | E032                     |
| Primary Natural Killer cells from peripheral blood             | Whole blood          | E046                     |
| Primary neutrophils from peripheral blood                      | Whole blood          | E030                     |
| Monocytes-CD14+ RO01746 Primary Cells                          | Whole blood          | E124                     |
| GM12878 Lymphoblastoid Cells                                   | TwinsUK-LCLs         | E116                     |
| GM12878 Lymphoblastoid Cells                                   | Geuvadis-LCLs        | E116                     |
| Foreskin Fibroblast Primary Cells skin01                       | Skin                 | E055                     |
| Foreskin Fibroblast Primary Cells skin02                       | Skin                 | E056                     |
| Foreskin Melanocyte Primary Cells skin01                       | Skin                 | E059                     |
| Foreskin Melanocyte Primary Cells skin03                       | Skin                 | E061                     |
| Foreskin Keratinocyte Primary Cells skin02                     | Skin                 | E057                     |
| Foreskin Keratinocyte Primary Cells skin03                     | Skin                 | E058                     |
| NHDF-Ad Adult Dermal Fibroblast Primary Cells                  | Skin                 | E126                     |
| NHEK-Epidermal Keratinocyte Primary Cells                      | Skin                 | E127                     |
| Adipose Derived Mesenchymal Stem Cell Cultured Cells           | Subcutaneous adipose | E025                     |
| Mesenchymal Stem Cell Derived Adipocyte Cultured Cells         | Subcutaneous adipose | E023                     |
| Adipose Nuclei                                                 | Subcutaneous adipose | E063                     |

Table S2: Relevant Roadmap Epigenomics consortium DNase Hypersensitivity site experiments with code for each analysed RNA-seq experiments. Experiment E116 was used to analyse both TwinsUK and Geuvadis LCLs, all other experiments were specific to one tissue.



## 331 References

- 332 G. R. Abecasis, A. Auton, L. D. Brooks, M. A. DePristo, R. M. Durbin *et al.* An integrated  
333 map of genetic variation from 1,092 human genomes. *Nature*, 491(7422):56–65, 2012. doi:  
334 10.1038/nature11632.
- 335 C. Bambace, I. Dahlman, P. Arner and A. Kulyté. Npc1 in human white adipose tissue and  
336 obesity. *BMC Endocrine disorders*, 13(1):1, 2013.
- 337 D. Bates, M. Mächler, B. Bolker and S. Walker. Fitting linear mixed-effects models using lme4.  
338 *arXiv preprint arXiv:1406.5823*, 2014.
- 339 C. Benner, C. C. Spencer, A. S. Havulinna, V. Salomaa, S. Ripatti *et al.* FINEMAP: efficient  
340 variable selection using summary data from genome-wide association studies. *Bioinformatics*,  
341 32(10):1493–1501, 2016. ISSN 1367-4803. doi:10.1093/bioinformatics/btw018.
- 342 A. A. Brown, A. Buil, A. Viñuela, T. Lappalainen, H.-F. Zheng *et al.* Genetic interactions  
343 affecting human gene expression identified by variance association mapping. *eLife*, 3:e01,381,  
344 2014. ISSN 2050-084X. doi:10.7554/eLife.01381.
- 345 A. Buil, A. A. Brown, T. Lappalainen, A. Viñuela, M. N. Davies *et al.* Gene-gene and gene-  
346 environment interactions detected by transcriptome sequence analysis in twins. *Nature Genet-*  
347 *ics*, 47(1):88–91, 2015. doi:10.1038/ng.3162[http://www.nature.com/ng/journal/v47/n1/abs/](http://www.nature.com/ng/journal/v47/n1/abs/ng.3162.html)  
348 [ng.3162.html](http://www.nature.com/ng/journal/v47/n1/abs/ng.3162.html)\#supplementary-information.
- 349 W. Chen, B. R. Larrabee, I. G. Ovsyannikova, R. B. Kennedy, I. H. Haralambieva *et al.* Fine  
350 Mapping Causal Variants with an Approximate Bayesian Method Using Marginal Test Statis-  
351 tics. *Genetics*, 200(3):719–36, 2015. ISSN 1943-2631. doi:10.1534/genetics.115.176107.
- 352 O. Delaneau, H. Ongen, A. A. Brown, A. Fort, N. Panousis *et al.* A complete tool set for  
353 molecular qtl discovery and analysis. *bioRxiv*, 2016. doi:10.1101/068635.

- 354 M. Fromer, P. Roussos, S. K. Sieberts, J. S. Johnson, D. H. Kavanagh *et al.* Gene expression  
355 elucidates functional impact of polygenic risk for schizophrenia. *bioRxiv*, page 052209, 2016.
- 356 C. Fuchsberger, J. Flannick, T. M. Teslovich, A. Mahajan, V. Agarwala *et al.* The genetic  
357 architecture of type 2 diabetes. *Nature*, 536(7614):41–7, 2016. ISSN 1476-4687. doi:10.1038/  
358 nature18642.
- 359 Global Lipids Genetics Consortium, C. J. Willer, E. M. Schmidt, S. Sengupta, G. M. Peloso *et al.*  
360 Discovery and refinement of loci associated with lipid levels. *Nature genetics*, 45(11):1274–83,  
361 2013. ISSN 1546-1718. doi:10.1038/ng.2797.
- 362 J. Harrow, A. Frankish, J. M. Gonzalez, E. Tapanari, M. Diekhans *et al.* GENCODE: the  
363 reference human genome annotation for The ENCODE Project. *Genome Res*, 22(9):1760–  
364 1774, 2012. doi:10.1101/gr.135350.111.
- 365 M. Horikoshi, R. N. Beaumont, F. R. Day, N. M. Warrington, M. N. Kooijman *et al.*  
366 Genome-wide associations for birth weight and correlations with adult disease. *Nature*,  
367 doi:10.1038/nature19806, 2016.
- 368 F. Hormozdiari, E. Kostem, E. Y. Kang, B. Pasaniuc and E. Eskin. Identifying causal variants  
369 at loci with multiple signals of association. *Genetics*, 198(2):497–508, 2014. ISSN 1943-2631.  
370 doi:10.1534/genetics.114.167908.
- 371 B. Howie, C. Fuchsberger, M. Stephens, J. Marchini and G. R. Abecasis. Fast and accurate  
372 genotype imputation in genome-wide association studies through pre-phasing. *Nat Genet*,  
373 44(8):955–959, 2012. doi:10.1038/ng.2354.
- 374 D. Jelinek, R. A. Heidenreich, R. P. Erickson and W. S. Garver. Decreased npc1 gene dosage in  
375 mice is associated with weight gain. *Obesity*, 18(7):1457–1459, 2010.

- 376 D. Jelinek, V. Millward, A. Birdi, T. P. Trouard, R. A. Heidenreich *et al.* Npc1 haploinsuffi-  
377 ciency promotes weight gain and metabolic features associated with insulin resistance. *Human*  
378 *molecular genetics*, 20(2):312–321, 2011.
- 379 E. S. Lander, L. M. Linton, B. Birren, C. Nusbaum, M. C. Zody *et al.* Initial sequencing and  
380 analysis of the human genome. *Nature*, 409(6822):860–921, 2001. doi:10.1038/35057062.
- 381 T. Lappalainen, M. Sammeth, M. R. Friedlander, P. A. t Hoen, J. Monlong *et al.* Transcriptome  
382 and genome sequencing uncovers functional variation in humans. *Nature*, 501(7468):506–511,  
383 2013. doi:10.1038/nature12531.
- 384 C. M. Lebreton and P. M. Visscher. Empirical nonparametric bootstrap strategies in quantitative  
385 trait loci mapping: conditioning on the genetic model. *Genetics*, 148(1):525–35, 1998. ISSN  
386 0016-6731.
- 387 H. Li and R. Durbin. Fast and accurate short read alignment with Burrows-Wheeler transform.  
388 *Bioinformatics*, 25(14):1754–1760, 2009. doi:10.1093/bioinformatics/btp324.
- 389 J. Z. Liu, S. van Sommeren, H. Huang, S. C. Ng, R. Alberts *et al.* Association analyses identify  
390 38 susceptibility loci for inflammatory bowel disease and highlight shared genetic risk across  
391 populations. *Nature genetics*, 47(9):979–86, 2015. ISSN 1546-1718. doi:10.1038/ng.3359.
- 392 A. E. Locke, B. Kahali, S. I. Berndt, A. E. Justice, T. H. Pers *et al.* Genetic studies of body  
393 mass index yield new insights for obesity biology. *Nature*, 518(7538):197–206, 2015. doi:  
394 10.1038/nature14177.
- 395 A. K. Manning, M.-F. Hivert, R. A. Scott, J. L. Grimsby, N. Bouatia-Naji *et al.* A genome-  
396 wide approach accounting for body mass index identifies genetic variants influencing fasting  
397 glycemic traits and insulin resistance. *Nature genetics*, 44(6):659–69, 2012. ISSN 1546-1718.  
398 doi:10.1038/ng.2274.

- 399 T. A. Manolio, F. S. Collins, N. J. Cox, D. B. Goldstein, L. A. Hindorff *et al.* Finding the missing  
400 heritability of complex diseases. *Nature*, 461(7265):747–753, 2009. doi:10.1038/nature08494.
- 401 J. Marchini and B. Howie. Genotype imputation for genome-wide association studies. *Nat Rev*  
402 *Genet*, 11(7):499–511, 2010. doi:10.1038/nrg2796.
- 403 S. Marco-Sola, M. Sammeth, R. Guigo and P. Ribeca. The GEM mapper: fast, accurate and  
404 versatile alignment by filtration. *Nat Methods*, 9(12):1185–1188, 2012. doi:10.1038/nmeth.  
405 2221.
- 406 D. Meyre, J. Delplanque, J.-C. Chèvre, C. Lecoeur, S. Lobbens *et al.* Genome-wide association  
407 study for early-onset and morbid adult obesity identifies three new risk loci in european  
408 populations. *Nature genetics*, 41(2):157–159, 2009.
- 409 A. C. Nica, S. B. Montgomery, A. S. Dimas, B. E. Stranger, C. Beazley *et al.* Candidate causal  
410 regulatory effects by integration of expression QTLs with complex trait genetic associations.  
411 *PLoS Genet*, 6(4):e1000895, 2010. doi:10.1371/journal.pgen.1000895.
- 412 M. Nikpay, A. Goel, H.-H. Won, L. M. Hall, C. Willenborg *et al.* A comprehensive 1,000  
413 Genomes-based genome-wide association meta-analysis of coronary artery disease. *Nature*  
414 *genetics*, 47(10):1121–30, 2015. ISSN 1546-1718. doi:10.1038/ng.3396.
- 415 H. Ongen, A. A. Brown, O. Delaneau, N. Panousis, A. C. Nica *et al.* Estimating the causal  
416 tissues for complex traits and diseases. *bioRxiv*, page 074682, 2016a.
- 417 H. Ongen, A. Buil, A. A. Brown, E. T. Dermitzakis and O. Delaneau. Fast and efficient QTL  
418 mapper for thousands of molecular phenotypes. *Bioinformatics*, 32(10):1479–1485, 2016b.  
419 ISSN 1367-4803. doi:10.1093/bioinformatics/btv722.
- 420 Roadmap Epigenomics Consortium, A. Kundaje, W. Meuleman, J. Ernst, M. Bilenky *et al.*

- 421 Integrative analysis of 111 reference human epigenomes. *Nature*, 518(7539):317–30, 2015.  
422 ISSN 1476-4687. doi:10.1038/nature14248.
- 423 E. B. Robinson, B. St Pourcain, V. Anttila, J. A. Kosmicki, B. Bulik-Sullivan *et al.* Genetic  
424 risk for autism spectrum disorders and neuropsychiatric variation in the general population.  
425 *Nature genetics*, 48(5):552–5, 2016. ISSN 1546-1718. doi:10.1038/ng.3529.
- 426 C. Schizophrenia Working Group of the Psychiatric Genomics. Biological insights from  
427 108 schizophrenia-associated genetic loci. *Nature*, 511(7510):421–427, 2014. doi:10.1038/  
428 nature13595.
- 429 B. Servin and M. Stephens. Imputation-based analysis of association studies: candidate regions  
430 and quantitative traits. *PLoS genetics*, 3(7):e114, 2007. ISSN 1553-7404. doi:10.1371/journal.  
431 pgen.0030114.
- 432 G. Sharma, C. Hu, J. L. Brigman, G. Zhu, H. J. Hathaway *et al.* Gper deficiency in male  
433 mice results in insulin resistance, dyslipidemia, and a proinflammatory state. *Endocrinology*,  
434 154(11):4136–4145, 2013.
- 435 S. T. Sherry, M.-H. Ward, M. Kholodov, J. Baker, L. Phan *et al.* dbSNP: the ncbi database of  
436 genetic variation. *Nucleic acids research*, 29(1):308–311, 2001.
- 437 S. L. Spain and J. C. Barrett. Strategies for fine-mapping complex traits. *Human molecular*  
438 *genetics*, 24(R1):R111–R119, 2015.
- 439 J. Storey, A. Bass, A. Dabney and D. Robinson. *qvalue: Q-value estimation for false discovery*  
440 *rate control*, 2015. R package version 2.2.2.
- 441 UK10K Consortium, K. Walter, J. L. Min, J. Huang, L. Crooks *et al.* The UK10K project  
442 identifies rare variants in health and disease. *Nature*, 526(7571):82–90, 2015. ISSN 1476-4687.  
443 doi:10.1038/nature14962.

444 P. M. Visscher, R. Thompson and C. S. Haley. Confidence intervals in QTL mapping by boot-  
445 strapping. *Genetics*, 143(2):1013–20, 1996. ISSN 0016-6731.

446 D. Welter, J. MacArthur, J. Morales, T. Burdett, P. Hall *et al.* The NHGRI GWAS Catalog, a  
447 curated resource of SNP-trait associations. *Nucleic Acids Res*, 42(Database issue):D1001–6,  
448 2014. doi:10.1093/nar/gkt1229.

449 A. R. Wood, T. Esko, J. Yang, S. Vedantam, T. H. Pers *et al.* Defining the role of com-  
450 mon variation in the genomic and biological architecture of adult human height. *Nat Genet*,  
451 46(11):1173–1186, 2014. doi:10.1038/ng.3097.
